# Supplementary material
Source: PubMed Central journal article supplement (PMC7017646)
Supplement: NIHMS1554556-supplement-Supporting_information.pdf [file NIHMS1554556-supplement-Supporting_information.pdf]

## **Supporting information:**

### **A Novel Mass Spectrometry Platform for Multiplexed N-glycoprotein Biomarker Discovery from Patient Biofluids by Antibody Panel Based N-glycan Imaging**

Alyson P. Black<sup>1</sup>, Hongyan Liang<sup>1</sup>, Connor A. West<sup>1</sup>, Mengjun Wang<sup>1</sup>, Harmin P. Herrera<sup>2</sup>, Brian B. Haab<sup>3</sup>, Peggi M. Angel<sup>1</sup>, Richard R. Drake<sup>1</sup>, Anand S. Mehta<sup>1\*</sup>

1) Medical University of South Carolina, Department of Cell and Molecular Pharmacology, 173 Ashley Avenue BSB 358, Charleston, SC, 29425 USA

2) Drexel University College of Medicine, Department of Microbiology and Immunology, 2900 Queen Lane, Philadelphia, Pennsylvania, 19129, USA

3) Van Andel Research Institute, Grand Rapids, MI, 49503 USA

\* To whom correspondence should be addressed. Email: mehtaa@musc.edu; Phone: 843-792-9946

## **Table of Contents:**

**Table S1: All observed N-glycans on A1AT and IgG.** Table showing all detected N-glycans on A1AT and IgG standards including mass to charge, error, composition, and proposed structure.

**Table S2: All observed N-glycans in capture from human serum.** Table showing all detected N-glycans in normal and cirrhotic patient serum including mass to charge, error, composition, and proposed structure.

**Figure S1: HPLC and lectin profiles of A1AT and IgG N-glycans.** Orthogonal confirmation of N-glycan profiles of the 2 glycoproteins analyzed in this study.

**Figure S2. Quantifications of N-glycan peaks shown in Figure 4.**

**Figure S3. Capture of A1AT and IgG from normal serum samples.**

**Figure S4. Quantifications of N-glycan peaks observed in normal and cirrhotic serum.**

**Table S1. All observed N-glycans on A1AT and IgG.** This table describes the m/z values of all N-glycans observed on A1AT and IgG protein standards.

| Theoretical mass | Observed mass | Error (ppm) | N-Glycan Composition   | Proposed N-glycan Structure                                                           |
|------------------|---------------|-------------|------------------------|---------------------------------------------------------------------------------------|
| 1282.4543        | 1282.4562     | 1.4815      | Hex3dHex1HexNAc3 + 1Na | 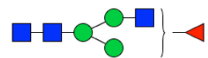   |
| 1298.4492        | 1298.4471     | 1.6019      | Hex4HexNAc3 + 1Na      |    |
| 1339.4757        | 1339.4731     | 1.9635      | Hex3HexNAc4 + 1Na      |    |
| 1444.5071        | 1444.5097     | 1.7861      | Hex4dHex1HexNAc3 + 1Na |    |
| 1485.5337        | 1485.5362     | 1.7098      | Hex3dHex1HexNAc4 + 1Na |   |
| 1501.5286        | 1501.5315     | 1.9380      | Hex4HexNAc4 + 1Na      |  |
| 1647.5865        | 1647.5825     | 2.4278      | Hex4dHex1HexNAc4 + 1Na |  |
| 1663.5814        | 1663.5781     | 1.9837      | Hex5HexNAc4 + 1Na      |  |
| 1688.6130        | 1688.6143     | 0.7521      | Hex3dHex1HexNAc5 + 1Na |  |
| 1704.6069        | 1704.6170     | 5.9486      | Hex4HexNAc5 + 1Na      |  |
| 1809.6393        | 1809.6397     | 0.2321      | Hex5dHex1HexNAc4 + 1Na |  |
| 1850.6710        | 1850.6682     | 1.5400      | Hex4dHex1HexNAc5 + 1Na |  |

|           |            |        |                              |  |
|-----------|------------|--------|------------------------------|--|
| 1866.6608 | 1866.6468  | 7.5000 | Hex5HexNAc5 + 1Na            |  |
| 1976.6666 | 1976.6618  | 2.4182 | Hex5HexNAc4NeuAc1 + 2Na      |  |
| 2012.7187 | 2012.7201  | 0.7105 | Hex5dHex1HexNAc5 + 1Na       |  |
| 2028.7136 | 2028.7196  | 2.9773 | Hex6HexNAc5 + 1Na            |  |
| 2122.7245 | 2122.7206  | 1.8467 | Hex5dHex1HexNAc4NeuAc1 + 2Na |  |
| 2174.7715 | 2174.7813  | 4.5062 | Hex6dHex1HexNAc5 + 1Na       |  |
| 2289.7722 | 2289.7638  | 3.6248 | Hex5HexNAc4NeuAc2 + 3Na      |  |
| 2341.8090 | 2341.7940  | 6.4138 | Hex6HexNAc5NeuAc1 + 2Na      |  |
| 2487.8669 | 2487.84282 | 9.6790 | Hex6dHex1HexNAc5NeuAc1 + 2Na |  |

**Table S2. All N-glycans observed in serum protein capture.** This table describes the m/z values of all N-glycans observed on proteins captured from human serum. Those marked with an asterisk were only seen in cirrhotic patient serum.

| Theoretical mass | Observed mass | Error (ppm) | N-Glycan Composition   | Proposed N-glycan Structure |
|------------------|---------------|-------------|------------------------|-----------------------------|
| *1257.4226       | 1257.4245     | 1.5110      | Hex5HexNAc2 + 1Na      |                             |
| 1282.4543        | 1282.4531     | 0.9357      | Hex3dHex1HexNAc3 + 1Na |                             |
| 1298.4492        | 1298.4504     | 0.9242      | Hex4HexNAc3 + 1Na      |                             |
| 1339.4757        | 1339.4799     | 3.1356      | Hex3HexNAc4 + 1Na      |                             |
| *1419.4755       | 1419.4737     | 1.2681      | Hex6HexNAc2 + 1Na      |                             |
| 1444.5071        | 1444.5082     | 0.7615      | Hex4dHex1HexNAc3 + 1Na |                             |
| 1485.5337        | 1485.5356     | 1.2790      | Hex3dHex1HexNAc4 + 1Na |                             |
| *1581.5283       | 1581.5338     | 3.4776      | Hex7HexNAc2 + 1Na      |                             |
| 1647.5865        | 1647.5885     | 1.2139      | Hex4dHex1HexNAc4 + 1Na |                             |
| 1663.5814        | 1663.5885     | 1.9837      | Hex5HexNAc4 + 1Na      |                             |
| 1688.6130        | 1688.6127     | 0.1777      | Hex3dHex1HexNAc5 + 1Na |                             |
| *1743.5811       | 1743.5828     | 0.9750      | Hex8HexNAc2 + 1Na      |                             |

|           |           |        |                              |  |
|-----------|-----------|--------|------------------------------|--|
| 1809.6393 | 1809.6344 | 2.7077 | Hex5dHex1HexNAc4 + 1Na       |  |
| 1850.6710 | 1850.6658 | 2.8098 | Hex4dHex1HexNAc5 + 1Na       |  |
| 1976.6666 | 1976.6577 | 4.5023 | Hex5HexNAc4NeuAc1 + 2Na      |  |
| 2012.7187 | 2012.7190 | 0.1491 | Hex5dHex1HexNAc5 + 1Na       |  |
| 2028.7136 | 2028.7241 | 5.1757 | Hex6HexNAc5 + 1Na            |  |
| 2122.7245 | 2122.7057 | 8.8565 | Hex5dHex1HexNAc4NeuAc1 + 2Na |  |
| 2174.7715 | 2174.7776 | 2.8049 | Hex6dHex1HexNAc5 + 1Na       |  |
| 2289.7722 | 2289.7623 | 4.3236 | Hex5HexNAc4NeuAc2 + 3Na      |  |
| 2325.8141 | 2325.7925 | 9.2871 | Hex5dHex1HexNAc5NeuAc1 + 2Na |  |
| 2341.8090 | 2341.7946 | 6.1491 | Hex6HexNAc5NeuAc1 + 2Na      |  |
| 2487.8669 | 2487.8506 | 6.5518 | Hex6dHex1HexNAc5NeuAc1 + 2Na |  |

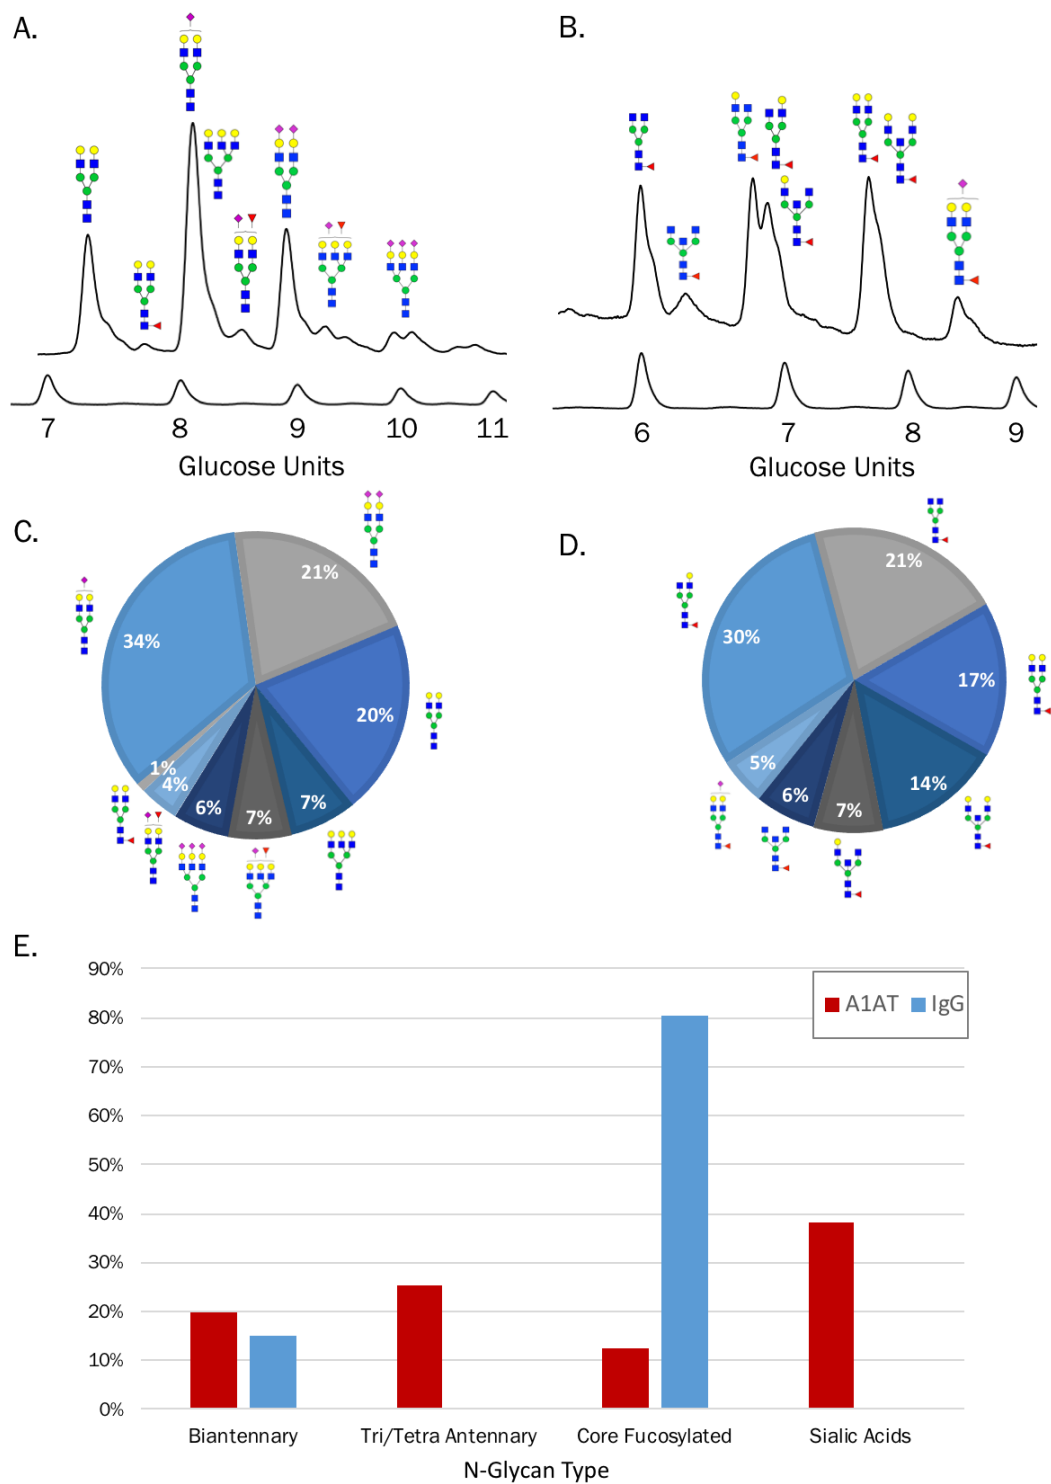

**Figure S1: HPLC and lectin profiles of A1AT and IgG N-glycans.** A-B) For orthogonal comparison of N-glycan profiles, A1AT and IgG were digested in-solution with PNGase F followed by HPLC analysis. C-D) Percentage of each N-glycan specie was calculated by the peak area divided by the total of all N-glycan peak areas. E) Prediction of N-glycans on A1AT and IgG by lectin profiling.

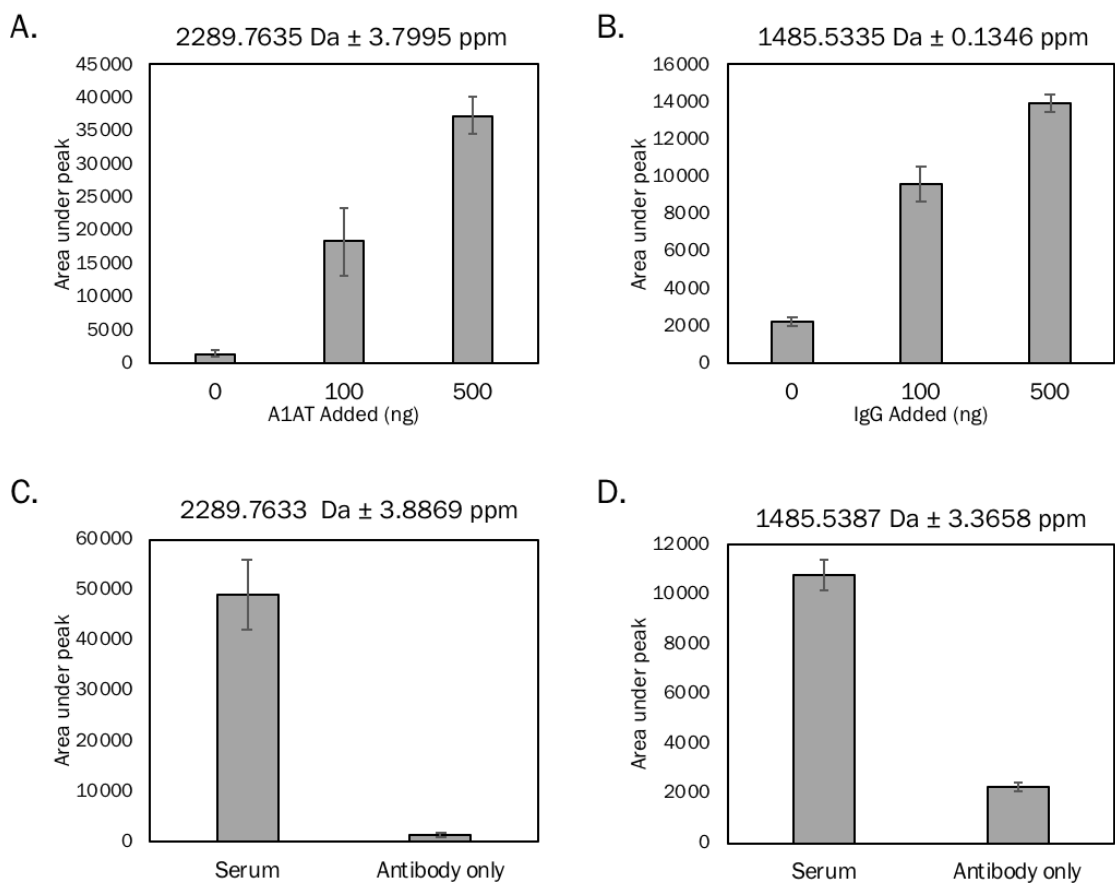

**Figure S2. Quantifications of N-glycan peaks observed in Figure 4.** A-D) Area under peak values were obtained for each region. Bars represent the mean  $\pm$  standard deviation of 3 samples and highlight that significant N-glycan signal was observed from each sample beyond that of the antibody background signal.



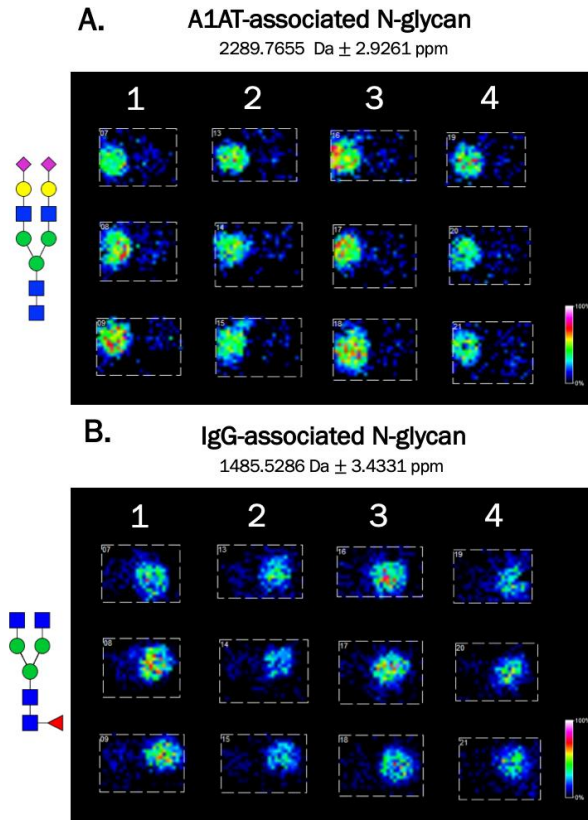

**Figure S3. Capture of A1AT and IgG from normal serum samples.** Normal human serum samples from 4 individual donors (SeraCare) were added to the array in triplicate. Donors were confirmed negative for HIV, HBV, and HCV. Samples were diluted 1:100 in PBS for a total of  $1\mu\text{L}$  serum added per well. Each well contained antibodies for anti-A1AT (left) and anti-IgG (right) as shown previously, spotted at  $200\text{ng}$  per  $1.5\mu\text{L}$  antibody spot. A) An A1AT-associated N-glycan was reproducibly observed localized to the left of each well. B) An IgG-associated N-glycan was reproducibly observed localized to the right of each well.

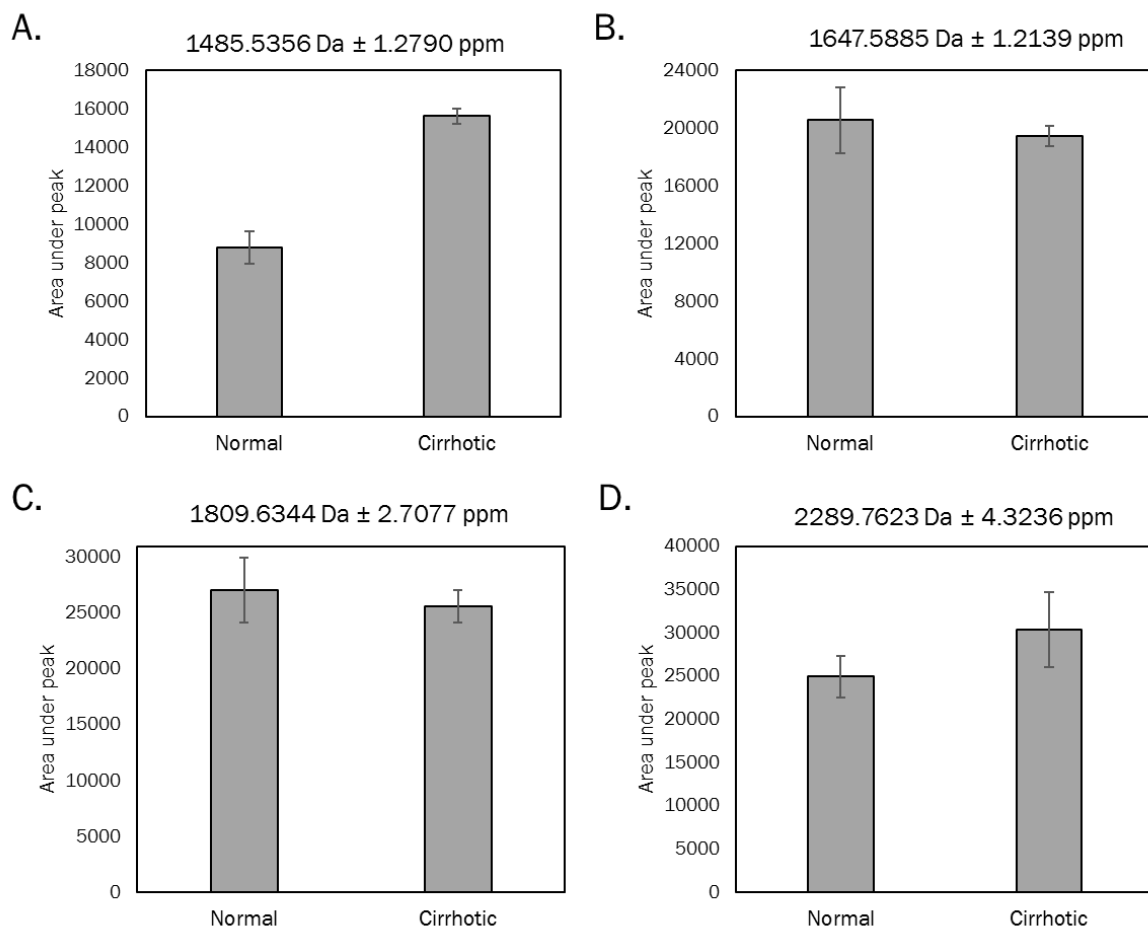

**Figure S4. Quantifications of N-glycan peaks observed in normal and cirrhotic serum.** A-C) IgG N-glycan intensities were compared by the area under peak values for each spot. Bars represent the mean  $\pm$  standard deviation of 3 samples and illustrate that not all IgG N-glycans are increased in cirrhotic serum as would be expected if the protein levels were varying. D) Comparison of an A1AT N-glycan by area under the peak values. Bars represent the mean  $\pm$  standard deviation of 3 samples.
